# Supplementary material for: An inhibitory segment within G-patch activators tunes Prp43-ATPase activity during ribosome assembly
Source: Springer Nature journal article supplement (doi:10.1038/s41467-024-54584-5), 2024-11-22
Supplement: MOESM1 [file 41467_2024_54584_MOESM1_ESM.pdf]

## **Supplementary Information**

### **An inhibitory segment within G-patch activators tunes Prp43-ATPase activity during ribosome assembly**

Daniela Portugal-Calisto, Alexander Gregor Geiger, Julius Rabl, Oscar Vadas, Michaela Oborská-Oplová, Jarosław Mazur, Federica Richina, Purnima Klingauf-Nerurkar, Erich Michel, Alexander Leitner, Daniel Boehringer & Vikram Govind Panse\*

\*Corresponding author. e-mail: vpanse@imm.uzh.ch

#### **Table of Contents**

1. Supplementary Tables 1 to 3 (p. 2 – 6)
2. Supplementary Figures 1 to 6 (p. 7 – 16)
3. Uncropped SDS-PAGE gels (p. 17)
4. Supplementary References (p. 18)

**Supplementary Table 1. Cryo-EM data collection, refinement, and validation statistics**

|                                           | dataset 1         | dataset 2 |
|-------------------------------------------|-------------------|-----------|
| Data collection and processing            |                   |           |
| Magnification                             | 105 000           | 130 000   |
| Voltage (kV)                              | 300               | 300       |
| Electron exposure (e-/Å <sup>2</sup> )    | 85                | 80        |
| Defocus range (μm)                        | -1 to -3          | -1 to -3  |
| Pixel size (Å)                            | 0.84              | 0.66      |
| Symmetry imposed                          | C1                |           |
| Initial particle images (no.)             | 3 087 725         |           |
| Final particle images (no.)               | 258 878           |           |
| Map resolution (Å)                        | 3.3               |           |
| FSC threshold                             | 0.143             |           |
| Map resolution range (Å)                  | 2.9 - 7.5         |           |
| Refinement                                |                   |           |
| Initial model used (PDB code)             | AlphaFold model   |           |
| Model resolution (Å)                      | 3.5               |           |
| FSC threshold                             | 0.5               |           |
| Map sharpening B factor (Å <sup>2</sup> ) | -159.5            |           |
| Model composition                         |                   |           |
| Non-hydrogen atoms                        | 5 504             |           |
| Protein residues                          | 680               |           |
| Ligands                                   | 1                 |           |
| B factors (Å <sup>2</sup> )               |                   |           |
| Protein                                   | 8.04/134.07/64.70 |           |
| Ligand                                    | 26.49/55.65/47.51 |           |
| R.m.s. deviations                         |                   |           |
| Bond lengths (Å)                          | 0.003             |           |
| Bond angles (°)                           | 0.517             |           |
| Validation                                |                   |           |
| MolProbity score                          | 1.28              |           |
| Clashscore                                | 3.19              |           |
| Poor rotamers (%)                         | 0.33              |           |
| Ramachandran plot                         |                   |           |
| Favored (%)                               | 97.03             |           |
| Allowed (%)                               | 2.97              |           |
| Disallowed (%)                            | 0                 |           |

**Supplementary Table 2. Yeast strains used in this study**

| Strain                   | Genotype                                                                            | Origin                                     |
|--------------------------|-------------------------------------------------------------------------------------|--------------------------------------------|
| BY4741                   | <i>MATa ura3 his3 leu2 met15 TRP1</i>                                               | Euroscarf                                  |
| NMY32                    | <i>MATa trp1 leu2 (lexAop)8-ADE2 LYS2::(lexAop)4-HIS3 URA3::(lexAop)8-lacZ GAL4</i> | Dualsystems Biotech AG                     |
| Tma23-TAP                | <i>MATa ura3 leu2 TRP1 TMA23-TAP::HIS3MX</i>                                        | Open biosystems                            |
| Pxr1-TAP                 | <i>MATa ura3 leu2 TRP1 PXR1-TAP::HIS3MX</i>                                         | Open biosystems                            |
| Prp43-TAP                | <i>MATa ura3 leu2 TRP1 PRP43-TAP::HIS3MX</i>                                        | Open biosystems                            |
| P <sub>GAL1</sub> -TMA23 | <i>MATa ura3 his3 leu2 met15 TRP1 P<sub>GAL1</sub>-TMA23::natNT2</i>                | This study                                 |
| P <sub>GAL1</sub> -PXR1  | <i>MATa ura3 his3 leu2 met15 TRP1 P<sub>GAL1</sub>-PXR1::natNT2</i>                 | This study                                 |
| <i>bud20Δ</i>            | <i>MATa his3 leu2 met15 ura3 BUD20::KANMX</i>                                       | Altwater <i>et al.</i> , 2012 <sup>1</sup> |
| <i>yrb2Δ</i>             | <i>MATa his3 leu2 met15 ura3 YRB2::KANMX</i>                                        | Altwater <i>et al.</i> , 2014 <sup>2</sup> |
| TMA23-GFP                | <i>MATa ura3 leu2 met15 TRP1 TMA23-GFP::HIS3MX</i>                                  | Open biosystems                            |
| PXR1-GFP                 | <i>MATa ura3 leu2 met15 TRP1 PXR1-GFP::HIS3MX</i>                                   | Open biosystems                            |
| TMA23-GFP GAR1-mCherry   | <i>MATa ura3 leu2 met15 TRP1 TMA23-GFP::HIS3MX GAR1- mCherry::kanMX6</i>            | This study                                 |
| PXR1-GFP GAR1-mCherry    | <i>MATa ura3 leu2 met15 TRP1 PXR1-GFP::HIS3MX GAR1- mCherry::kanMX6</i>             | This study                                 |

**Supplementary Table 3. Plasmids used in this study**

| Plasmid                                             | Relevant markers                                                               | Source     |
|-----------------------------------------------------|--------------------------------------------------------------------------------|------------|
| pRS315-TMA23                                        | <i>TMA23 CEN LEU2 AMP</i>                                                      | This study |
| pRS315-TMA23 <sup>L7E</sup>                         | <i>TMA23 L7E CEN LEU2 AMP</i>                                                  | This study |
| pRS315-PXR1                                         | <i>PXR1 CEN LEU2 AMP</i>                                                       | This study |
| pRS315-PXR1 <sup>L33E</sup>                         | <i>PXR1 L33E CEN LEU2 AMP</i>                                                  | This study |
| pRS315-PXR1 <sup>F126A</sup>                        | <i>PXR1 F126A CEN LEU2 AMP</i>                                                 | This study |
| pRS315-PXR1 <sup>GM</sup> -TMA23 <sup>D</sup>       | <i>PXR1<sup>GM</sup> (1-137)-TMA23<sup>D</sup> (111-211) CEN LEU2 AMP</i>      | This study |
| pRS315-PXR1 <sup>GM-F126A</sup> -TMA23 <sup>D</sup> | <i>PXR1<sup>GM</sup> (1-137)F126A-TMA23<sup>D</sup> (111-211) CEN LEU2 AMP</i> | This study |
| pRS315-TMA23 <sup>GM</sup> -PXR1 <sup>D</sup>       | <i>TMA23<sup>GM</sup> (1-110)-PXR1<sup>D</sup> (138-271) CEN LEU2 AMP</i>      | This study |
| pRS315-TMA23 <sup>GM-F96A</sup> -PXR1 <sup>D</sup>  | <i>TMA23<sup>GM</sup> (1-110) F96A-PXR1<sup>D</sup> (138-271) CEN LEU2 AMP</i> | This study |

|                                                    |                                                                           |                                            |
|----------------------------------------------------|---------------------------------------------------------------------------|--------------------------------------------|
| pRS315-Pxr1 <sup>GM</sup> -Cov2 <sup>C</sup>       | PXR1 <sup>GM</sup> (1-137)-COV2 <sup>C</sup> (250-364) CEN LEU2 AMP       | This study                                 |
| pRS315-Pxr1 <sup>GM-F126A</sup> -Cov2 <sup>C</sup> | PXR1 <sup>GM</sup> (1-137) F126A-COV2 <sup>C</sup> (250-364) CEN LEU2 AMP | This study                                 |
| pRS315-TMA23 <sup>GM</sup> -Cov2 <sup>C</sup>      | TMA23 <sup>GM</sup> (1-110)-COV2 <sup>C</sup> (250-364) CEN LEU2 AMP      | This study                                 |
| pRS315-TMA23 <sup>GM-F96A</sup> -Cov2 <sup>C</sup> | TMA23 <sup>GM</sup> (1-110) F96A-COV2 <sup>C</sup> (250-364) CEN LEU2 AMP | This study                                 |
| pRS315-uL18-GFP                                    | RPL5-GFP CEN LEU2 AMP                                                     | Altwater <i>et al.</i> , 2012 <sup>1</sup> |
| pRS315-uS5-eGFP                                    | RPS2-eGFP CEN LEU2 AMP                                                    | Altwater <i>et al.</i> , 2014 <sup>2</sup> |
| pRS313-TMA23                                       | TMA23 CEN HIS3 AMP                                                        | This study                                 |
| pRS313-TMA23 <sup>F96A</sup>                       | TMA23 F96A CEN HIS3 AMP                                                   | This study                                 |
| pLexA-PRP43                                        | LexA-PRP43 2 $\mu$ TRP1 AMP                                               | This study                                 |
| pLexA-PXR1                                         | LexA-PXR1 2 $\mu$ TRP1 AMP                                                | This study                                 |
| pLexA-PXR1 <sup>GM</sup>                           | LexA-PXR1 <sup>GM</sup> (1-137) 2 $\mu$ TRP1 AMP                          | This study                                 |
| pLexA-PXR1 <sup>GM</sup> L33E                      | LexA-PXR1 <sup>GM</sup> (1-137) L33E 2 $\mu$ TRP1 AMP                     | This study                                 |
| pLexA-PXR1 <sup>GM</sup> W38A                      | LexA-PXR1 <sup>GM</sup> (1-137) W38A 2 $\mu$ TRP1 AMP                     | This study                                 |
| pLexA-PXR1 <sup>GM</sup> L44E                      | LexA-PXR1 <sup>GM</sup> (1-137) L44E 2 $\mu$ TRP1 AMP                     | This study                                 |
| pLexA-PXR1 <sup>GM</sup> G66E                      | LexA-PXR1 <sup>GM</sup> (1-137) G66E 2 $\mu$ TRP1 AMP                     | This study                                 |
| pLexA-PXR1 <sup>GM</sup> L67E                      | LexA-PXR1 <sup>GM</sup> (1-137) L67E 2 $\mu$ TRP1 AMP                     | This study                                 |
| pLexA-PXR1 <sup>G</sup>                            | LexA-PXR1 <sup>G</sup> (1-79) 2 $\mu$ TRP1 AMP                            | This study                                 |
| pLexA-PXR1 <sup>M</sup>                            | LexA-PXR1 <sup>M</sup> (72-137) 2 $\mu$ TRP1 AMP                          | This study                                 |
| pLexA-PXR1 <sup>M-F126A</sup>                      | LexA-PXR1 <sup>M</sup> (72-137) F126A 2 $\mu$ TRP1 AMP                    | This study                                 |
| pLexA-PXR1 <sup>D</sup>                            | LexA-PXR1 <sup>D</sup> (137-271) 2 $\mu$ TRP1 AMP                         | This study                                 |
| pLexA-TMA23                                        | LexA-TMA23 (1-211) 2 $\mu$ TRP1 AMP                                       | This study                                 |
| pLexA-TMA23 <sup>D</sup>                           | LexA-TMA23 <sup>D</sup> (110-211) 2 $\mu$ TRP1 AMP                        | This study                                 |
| pLexA-LAMINC                                       | LexA-LAMINC 2 $\mu$ TRP1 KAN                                              | Dual Systems                               |
| pACT2.2-TMA23                                      | GAL4 AD-TMA23 2 $\mu$ LEU2 AMP                                            | This study                                 |
| pACT2.2-TMA23 <sup>GM</sup>                        | GAL4 AD-TMA23 <sup>GM</sup> (1-110) 2 $\mu$ LEU2 AMP                      | This study                                 |
| pACT2.2-TMA23 <sup>GM</sup> L7E                    | GAL4 AD-TMA23 <sup>GM</sup> (1-110) L7E 2 $\mu$ LEU2 AMP                  | This study                                 |
| pACT2.2-TMA23 <sup>GM</sup> W12A                   | GAL4 AD-TMA23 <sup>GM</sup> (1-110) W12A 2 $\mu$ LEU2 AMP                 | This study                                 |

|                                                     |                                                                                          |                                          |
|-----------------------------------------------------|------------------------------------------------------------------------------------------|------------------------------------------|
| pACT2.2-TMA23 <sup>GM</sup> F18E                    | GAL4 AD-TMA23 <sup>GM</sup> (1-110) F18E 2μ LEU2 AMP                                     | This study                               |
| pACT2.2-TMA23 <sup>GM</sup> G37E                    | GAL4 AD-TMA23 <sup>GM</sup> (1-110) G37E 2μ LEU2 AMP                                     | This study                               |
| pACT2.2-TMA23 <sup>GM</sup> L38E                    | GAL4 AD-TMA23 <sup>GM</sup> (1-110) L38E 2μ LEU2 AMP                                     | This study                               |
| pACT2.2-TMA23 <sup>G</sup>                          | GAL4 AD-TMA23 <sup>G</sup> (1-53) 2μ LEU2 AMP                                            | This study                               |
| pACT2.2-TMA23 <sup>M</sup>                          | GAL4 AD-TMA23 <sup>M</sup> (43-110) 2μ LEU2 AMP                                          | This study                               |
| pACT2.2-TMA23 <sup>M-F96A</sup>                     | GAL4 AD-TMA23 <sup>M</sup> (43-110) F96A 2μ LEU2 AMP                                     | This study                               |
| pACT2.2-TMA23 <sup>D</sup>                          | GAL4 AD-TMA23 <sup>D</sup> (110-211) 2μ LEU2 AMP                                         | This study                               |
| pACT2.2-TMA23 <sup>GM</sup> -Pxr1 <sup>D</sup>      | GAL4 AD-TMA23 <sup>GM</sup> (1-110) 2μ LEU2 AMP                                          | This study                               |
| pACT2.2-TMA23 <sup>GM-F96A</sup> -Pxr1 <sup>D</sup> | GAL4 AD-TMA23 <sup>GM</sup> (1-110) F96A 2μ LEU2 AMP                                     | This study                               |
| pACT2.2-PXR1                                        | GAL4 AD-PXR1 2μ LEU2 AMP                                                                 | This study                               |
| pACT2.2-PXR1 <sup>GM</sup>                          | GAL4 AD-PXR1 <sup>GM</sup> (1-137) 2μ LEU2 AMP                                           | This study                               |
| pACT2.2-PXR1 <sup>D</sup>                           | GAL4 AD-PXR1 <sup>D</sup> (137-271) 2μ LEU2 AMP                                          | This study                               |
| pACT-PRP43                                          | GAL4 AD-PRP43 2μ LEU2 AMP                                                                | This study                               |
| pACT-LargeT                                         | GAL4 AD-SV40 largeT antigen 2μ LEU2 AMP                                                  | Dual Systems                             |
| pET47b-PRP43                                        | HIS <sub>6</sub> -PRP43 KAN                                                              | This study                               |
| pET47b-PRP43-T <sup>G</sup>                         | HIS <sub>6</sub> -PRP43-linker-TMA23 <sup>G</sup> (1-53) KAN<br>Linker: GGGSGGGSGGGSGSPW | This study                               |
| pET47b-PRP43-P <sup>G</sup>                         | HIS <sub>6</sub> -PRP43-linker-Pxr1 <sup>G</sup> (1-79) KAN<br>Linker: GGGSGGGSGGGSGSPW  | This study                               |
| pGEX-6P-1                                           | GST AMP                                                                                  | Demmel <i>et al.</i> , 2008 <sup>3</sup> |
| pGEX-6P-1-TMA23 <sup>GM</sup>                       | GST-TMA23 <sup>GM</sup> (1-111) AMP                                                      | This study                               |
| pGEX-6P-1-TMA23 <sup>GM</sup> L7E                   | GST-TMA23 <sup>GM</sup> (1-111) L7E AMP                                                  | This study                               |
| pGEX-6P-1-TMA23 <sup>GM</sup> W12A                  | GST-TMA23 <sup>GM</sup> (1-111) W12A AMP                                                 | This study                               |
| pGEX-6P-1-TMA23 <sup>GM</sup> F18E                  | GST-TMA23 <sup>GM</sup> (1-111) F18E AMP                                                 | This study                               |
| pGEX-6P-1-TMA23 <sup>GM</sup> G37E                  | GST-TMA23 <sup>GM</sup> (1-111) G37E AMP                                                 | This study                               |
| pGEX-6P-1-TMA23 <sup>GM</sup> L38E                  | GST-TMA23 <sup>GM</sup> (1-111) L38E AMP                                                 | This study                               |
| pGEX-6P-1-TMA23 <sup>G</sup>                        | GST-TMA23 <sup>G</sup> (1-53) AMP                                                        | This study                               |
| pGEX-6P-1-TMA23 <sup>M</sup>                        | GST-TMA23 <sup>M</sup> (43-111) AMP                                                      | This study                               |
| pGEX-6P-1-TMA23 <sup>M44</sup>                      | GST-TMA23 <sup>M</sup> (68-111) AMP                                                      | This study                               |

|                                          |                                                |            |
|------------------------------------------|------------------------------------------------|------------|
| pGEX-6P-1- <i>TMA23<sup>M</sup></i> F96A | <i>GST-TMA23<sup>M</sup> (43-111) F96A AMP</i> | This study |
| pGEX-6P-1- <i>TMA23<sup>D</sup></i>      | <i>GST-TMA23<sup>D</sup> (111-211) AMP</i>     | This study |
| pGEX-6P-1- <i>PXR1<sup>GM</sup></i>      | <i>GST-PXR1<sup>GM</sup> (1-137) AMP</i>       | This study |
| pGEX-6P-1- <i>PXR1<sup>GM</sup></i> L33E | <i>GST-PXR1<sup>GM</sup> (1-137) L33E AMP</i>  | This study |
| pGEX-6P-1- <i>PXR1<sup>GM</sup></i> W38A | <i>GST-PXR1<sup>GM</sup> (1-137) W38A AMP</i>  | This study |
| pGEX-6P-1- <i>PXR1<sup>GM</sup></i> L44E | <i>GST-PXR1<sup>GM</sup> (1-137) L44E AMP</i>  | This study |
| pGEX-6P-1- <i>PXR1<sup>GM</sup></i> G66E | <i>GST-PXR1<sup>GM</sup> (1-137) G66E AMP</i>  | This study |
| pGEX-6P-1- <i>PXR1<sup>GM</sup></i> L67E | <i>GST-PXR1<sup>GM</sup> (1-137) L67E AMP</i>  | This study |
| pGEX-6P-1- <i>PXR1<sup>G</sup></i>       | <i>GST-PXR1<sup>G</sup> (1-79) AMP</i>         | This study |
| pGEX-6P-1- <i>PXR1<sup>M</sup></i>       | <i>GST-PXR1<sup>M</sup> (72-137) AMP</i>       | This study |
| pGEX-6P-1- <i>PXR1<sup>M14</sup></i>     | <i>GST-PXR1<sup>M</sup> (124-137) AMP</i>      | This study |
| pGEX-6P-1- <i>PXR1<sup>M</sup></i> F126A | <i>GST-PXR1<sup>M</sup> (72-137) F126A AMP</i> | This study |
| pGEX-6P-1- <i>PXR1<sup>D</sup></i>       | <i>GST-PXR1<sup>D</sup> (137-271) AMP</i>      | This study |
| pGEX-6P-1- <i>PFA1<sup>G</sup></i>       | <i>GST-PFA1<sup>G</sup> (710-767) AMP</i>      | This study |

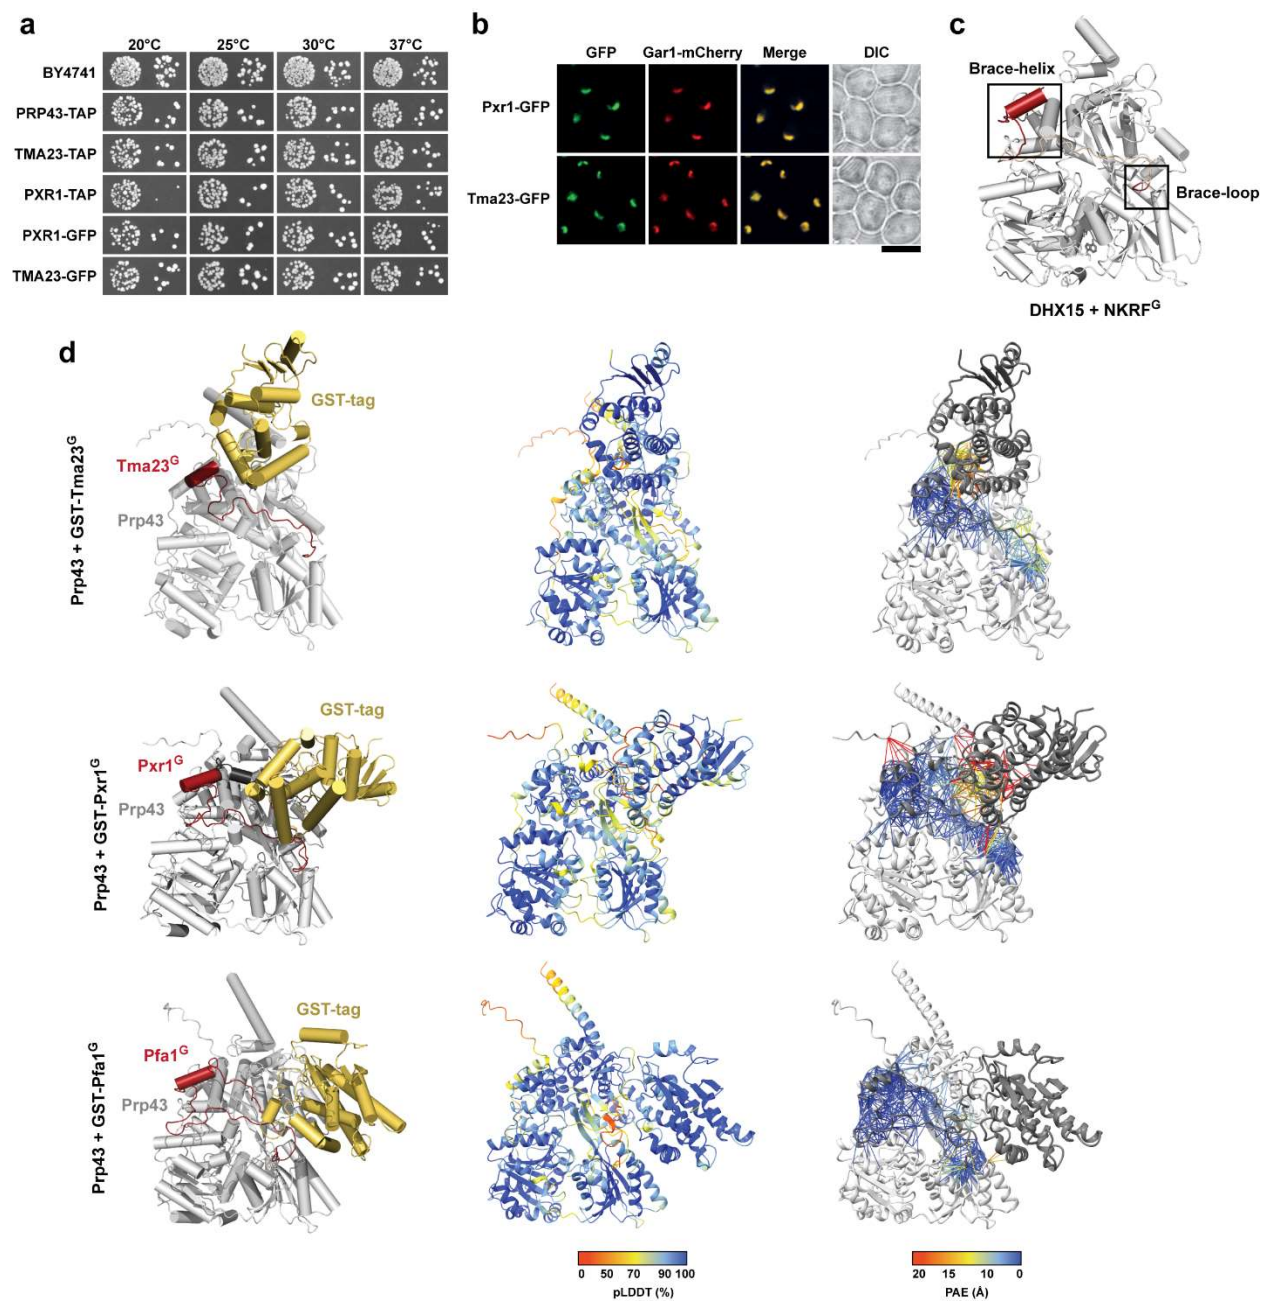

Supplementary Figure 1. (legend on next page)

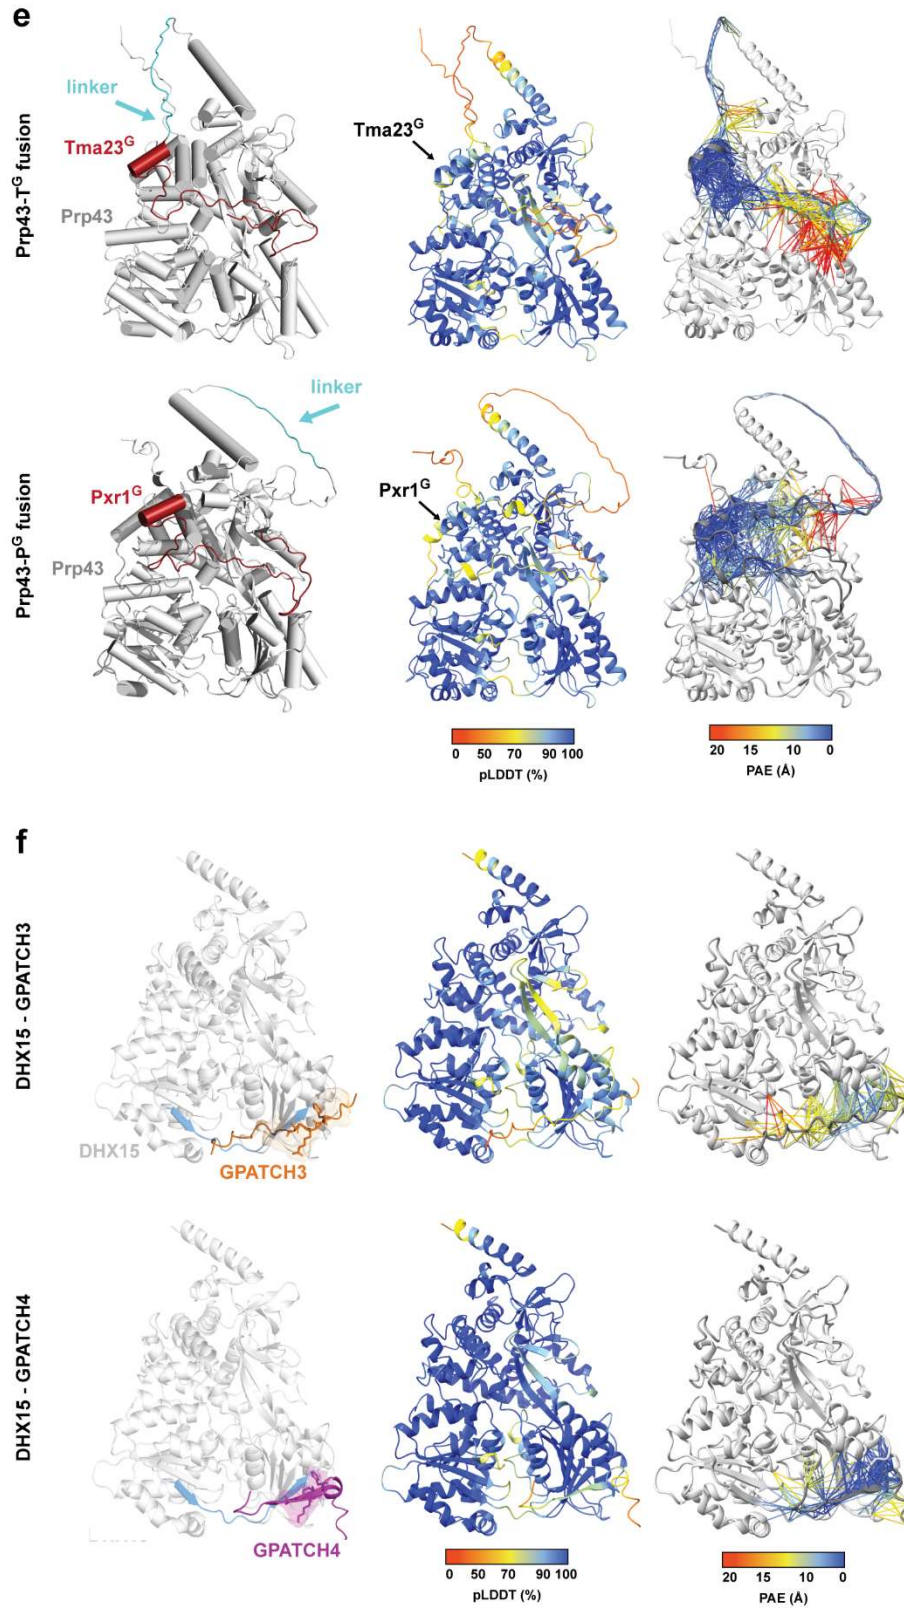

**Supplementary Figure 1. C-terminal tagging of Prp43, Pxr1 and Tma23 strains does not compromise protein function. a,** Different strains were spotted in 10-fold serial dilutions on YPD plates and incubated

at the indicated temperatures for 2 – 5 days. BY4741 cells were used as control. **b**, Cellular location of C-terminal fusions of Pxr1 and Tma23 to GFP were localized by fluorescence microscopy. Gar1-mCherry served as a nucleolar marker. Scale bar = 5  $\mu$ m. **c**, Cartoon representation of DHX15:NKRF<sup>G</sup> complex shows how G-patches bind to the RNA helicase (PDB 6SH6)<sup>4</sup>. The G-patch is depicted in red and the position of the brace-helix and the brace-loop within NKRF<sup>G</sup> is highlighted by black squares. Helices are shown as cylinders. **d**, AlphaFold2-derived models of Prp43 (grey) in complex with different G-patch segments (red) fused to N-terminal GST tags (yellow). The complexes are shown with cartoon representation and helices are depicted as cylinders. **e**, AlphaFold2-derived models of Prp43-T<sup>G</sup> and Prp43-P<sup>G</sup> fusion constructs. The proteins were fused by a glycine-serine linker displayed in blue. **f**, AlphaFold2-derived models of DHX15 (light grey) with putative I-patches of known human G-patch DHX15 cofactors (orange and magenta) show the same binding site as for the yeast Prp43 (highlighted in blue). **(d-f)**, Predicted local distance difference test (pLDDT) and predicted aligned error (PAE) scores for the indicated AlphaFold2-predicted complexes. The pseudobonds indicating the PAE between pairs of residues were set for 8 Å. Structures were analyzed using ChimeraX (version 1.7.1, UCSF Chimera, National Institutes of Health, CA, USA)<sup>5</sup>.

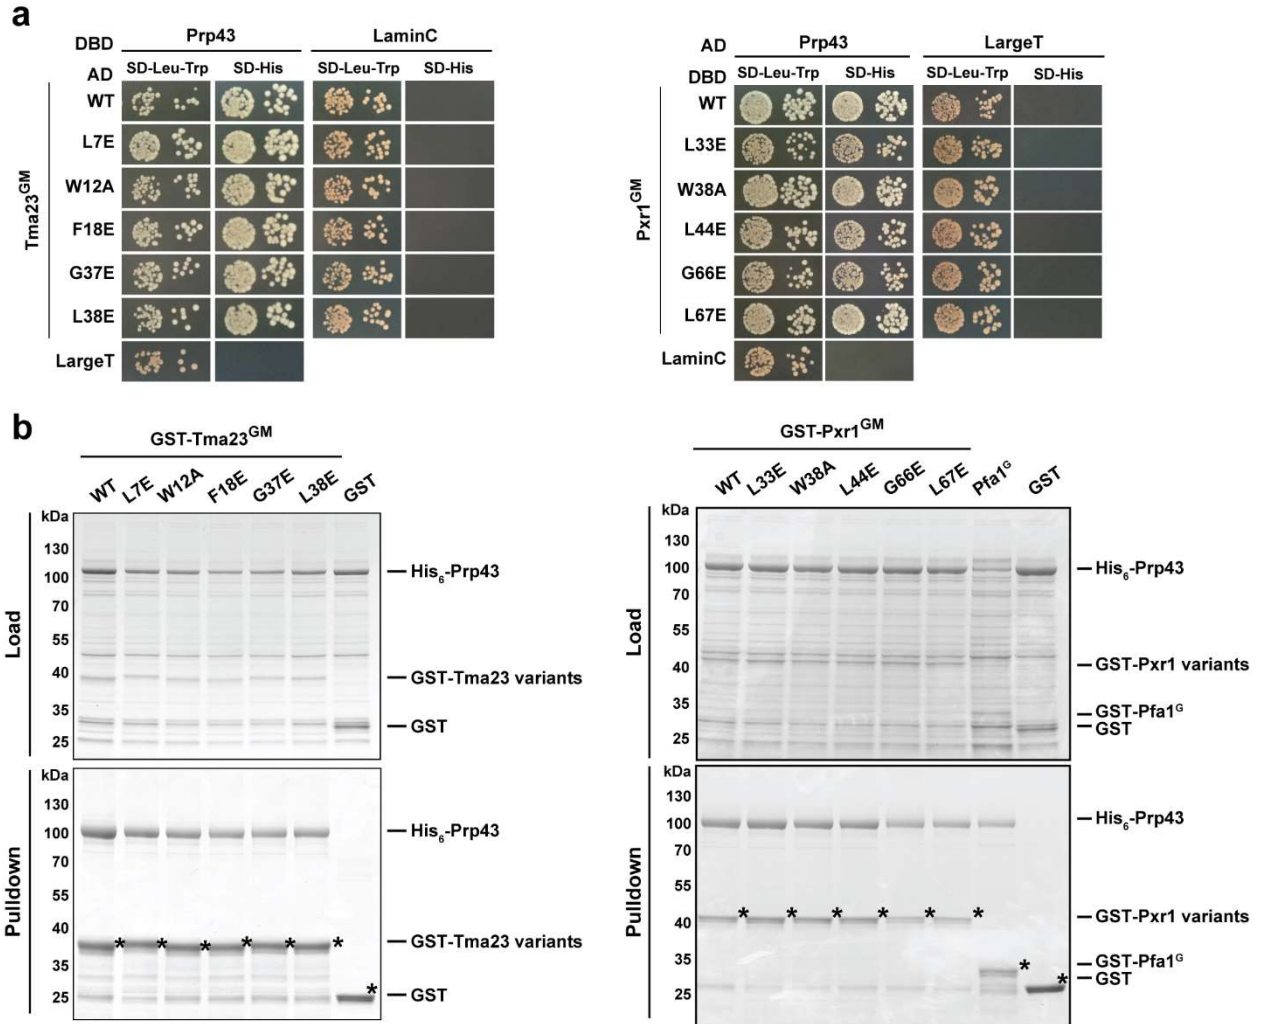

**Supplementary Figure 2. Point mutants within Tma23<sup>G</sup> and Pxr1<sup>G</sup> do not abolish binding to Prp43.**

**a**, Yeast NMY32 strain transformed with plasmids encoding for the indicated LexA DNA-binding domain (DBD) and GAL4 activation domain (AD) fusion proteins was spotted in 10-fold serial dilutions on the indicated medium and incubated at 30°C for 2 – 4 days. LaminC and LargeT were used as negative controls. **b**, Recombinant His<sub>6</sub>-Prp43 was co-expressed in *E. coli* with the indicated GST-fused Tma23<sup>G</sup> and Pxr1<sup>G</sup> wild type or mutant constructs, with Pfa1<sup>G</sup>, or GST and affinity-purified using Glutathione Sepharose 4 Fast Flow beads (Cytiva). Proteins were eluted by heating the samples to 70°C, separated on a SurePAGE 4-20% BIS-TRIS gradient gel by SDS-PAGE, and visualized by Coomassie Blue staining. Pfa1<sup>G</sup> and GST were used as positive and negative controls, respectively. Asterisks indicate the baits. kDa refers to protein molecular weight.

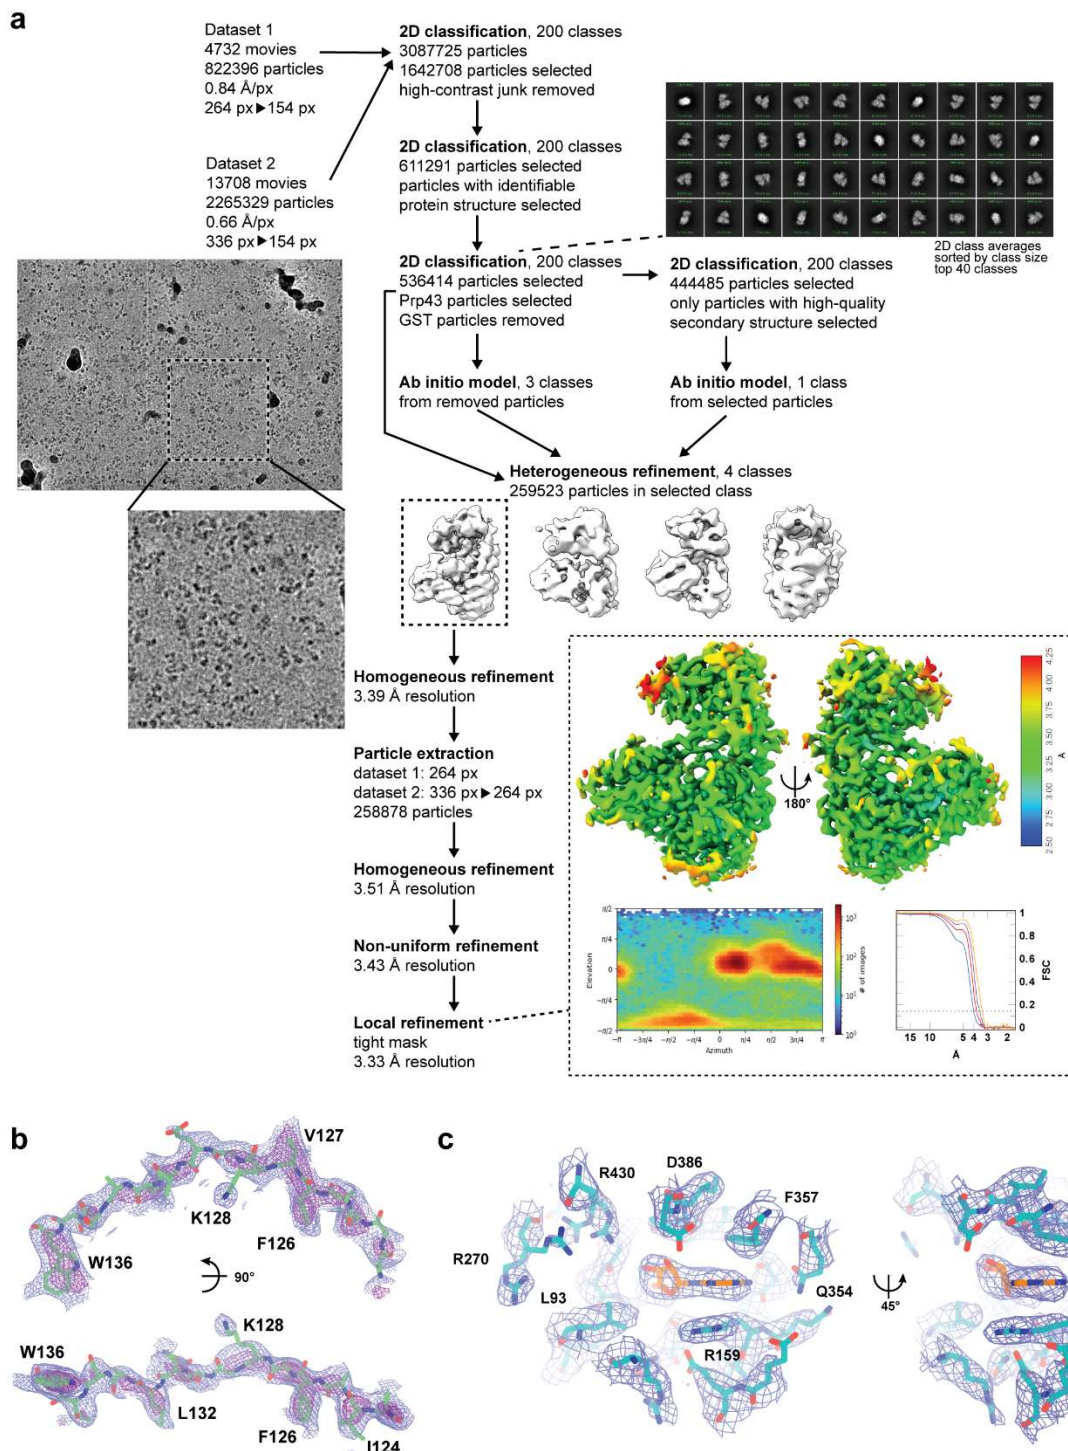

**Supplementary Figure 3. Single particle cryo-EM processing workflow.** **a**, Schematic representation of the cryo-EM image processing workflow of the Prp43-Pxr1<sup>GM</sup> complex. The resolution map, the orientation distribution plot and the FSC plot (blue: unmasked, red: circular mask, purple: loose mask, orange: tight mask) of the final reconstruction are shown in the inset. A representative micrograph is shown. **b**, The experimental cryo-EM density around Pxr1 is shown as blue (sigma=4.0) and purple (sigma=10.0)

mesh. The refined atomic model of Pxr1 is shown as green stick model. **c**, Experimental density at the active site shown in mesh representation, with threshold 8 sigma.



The RecA2 domain of Prp43:Pxr1<sup>GM</sup> complex adopts a conformation most similar to ADP-bound Prp43, DHX8, DHX15, or Prp2, and clearly distinct from the RecA2 conformation adopted by ATP-analog bound Prp43 or catalytically dead mutants (ASM) of Prp43. **b**, Structural comparison of the connecting loop with respect to the bound nucleotide, measured by center of mass 3D-displacement (in Å) of the RecA2 domain of Prp43:Pxr1<sup>GM</sup> complex when compared to other available structures of Prp43 and other DEAH/RHA RNA helicases. The C-terminal resolved residue of Pxr1<sup>GM</sup> (W136, green) binds R270 and Y272 of Prp43, which are located at the connecting loop. This loop can adopt two different conformations regarding the position of the bound nucleotide: the distal conformation observed in ADP-bound Prp43 (blue) and Prp43:Pxr1<sup>GM</sup> complex (teal), and the proximal conformation observed in CtPrp43 bound to an ATP-analog (orange). In the distal conformation, residue R270 extends towards the solvent, facing away from the active site. In the proximal position, the same arginine (R273 in *C. thermophilum*) faces inwards due to a displacement of the loop and binds T118 (T121 in *C. thermophilum*) at the active site. Displacement of T271 (T274 in *C. thermophilum*) towards the active site by 7 Å brings it into direct proximity of the bound nucleotide. Adoption of the proximal conformation coincides with displacement of the RecA2 domain (center of mass 3D-displacement in Å, structures with the connecting loop in proximal position shown in orange, Prp43/DHX15 structures with RecA loop in distal position shown in blue, Prp43:Pxr1<sup>GM</sup> complex shown in teal). The connecting loop is observed in the proximal position in Prp43-ATP analog, Prp43 ASM, Prp2-ATP analog, DHX36 and DHX36 with ATP analog, and in MLE-ATP analog (all show in orange), while the distal conformation is found in ADP- or CDP-bound Prp43, DHX15-ADP, DHX15-NKRF, DHX15-NKRF-ADP (blue). **c**, The C-terminal domains of Prp43 and homologous helicases adopt a position along a continuum between the fully open (Prp43-ATP analog, left) and the fully closed (DHX9-ADP, right) RNA tunnel conformation, depending on the bound nucleotide, RNA, and additional factors. Center of mass 3D-displacement (in Å) with reference to the C-terminal domains of Prp43:Pxr1<sup>GM</sup> complex; shown in the plot are: Prp43 complexes<sup>7-12</sup> (teal), DHX9<sup>18</sup> (rose), DHX15 complexes<sup>4,14,15</sup> (green), Prp2<sup>17,19,20</sup> (cyan). The C-terminal domain of Prp43:Pxr1<sup>GM</sup> complex adopts the open conformation, structurally closest to ATP-bound Prp43 and Prp43 ASM. The C-terminal domains in ADP-bound DHX15 (green), ADP-bound Prp2 (cyan) and ATP-analog bound Prp2 with RNA (cyan) adopt very similar conformations to their Prp43 counterparts. **(a-c)** Plots were created using the script available in the Source Data file.

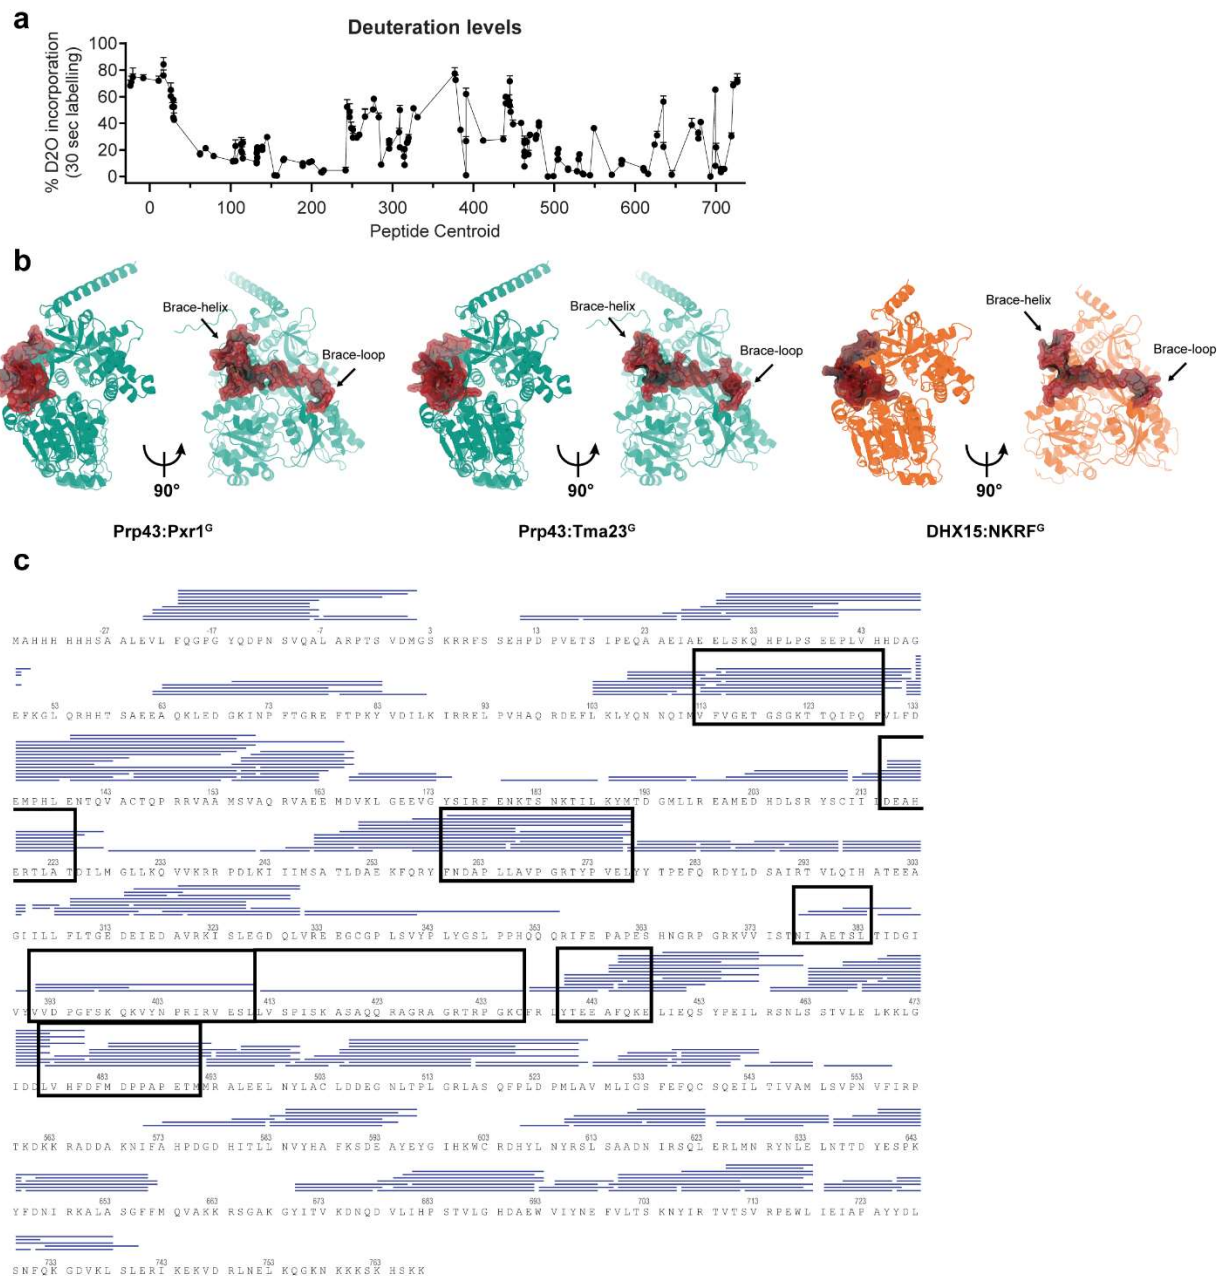

**Supplementary Figure 5. HDX-MS analysis of Prp43 alone and in complex with either Pxr1<sup>GM</sup> or Tma23<sup>GM</sup>.** **a**, Deuterium incorporation level of each Prp43 peptide, shown as % deuteration after a 30 sec exposure compared to a theoretical maximally deuterated value. Each dot represents one peptide, plotted based on its central residue (centroid). Values shown as percentage deuteration after 30 sec (mean  $\pm$  SD,  $n=3$ ). **b**, Direct structural comparison of G-patch binding to Prp43, including the predicted AlphaFold2 models of Prp43:Pxr1<sup>G</sup> and Prp43:Tma23<sup>G</sup> complexes, and the experimental X-ray crystal structure of DHX15:NKRF<sup>G</sup> (PDB: 6SH6)<sup>4</sup>. The structure of the helicase is shown as cartoon, while the model of the regulatory factor is shown as sticks overlaid with a semitransparent surface. **c**, Peptide map showing the

different H/D protected regions are indicated along the Prp43 primary sequence. Peptides shown in the uptake plots (see Fig. 7) are boxed. Residue numbering in accordance with the native protein.

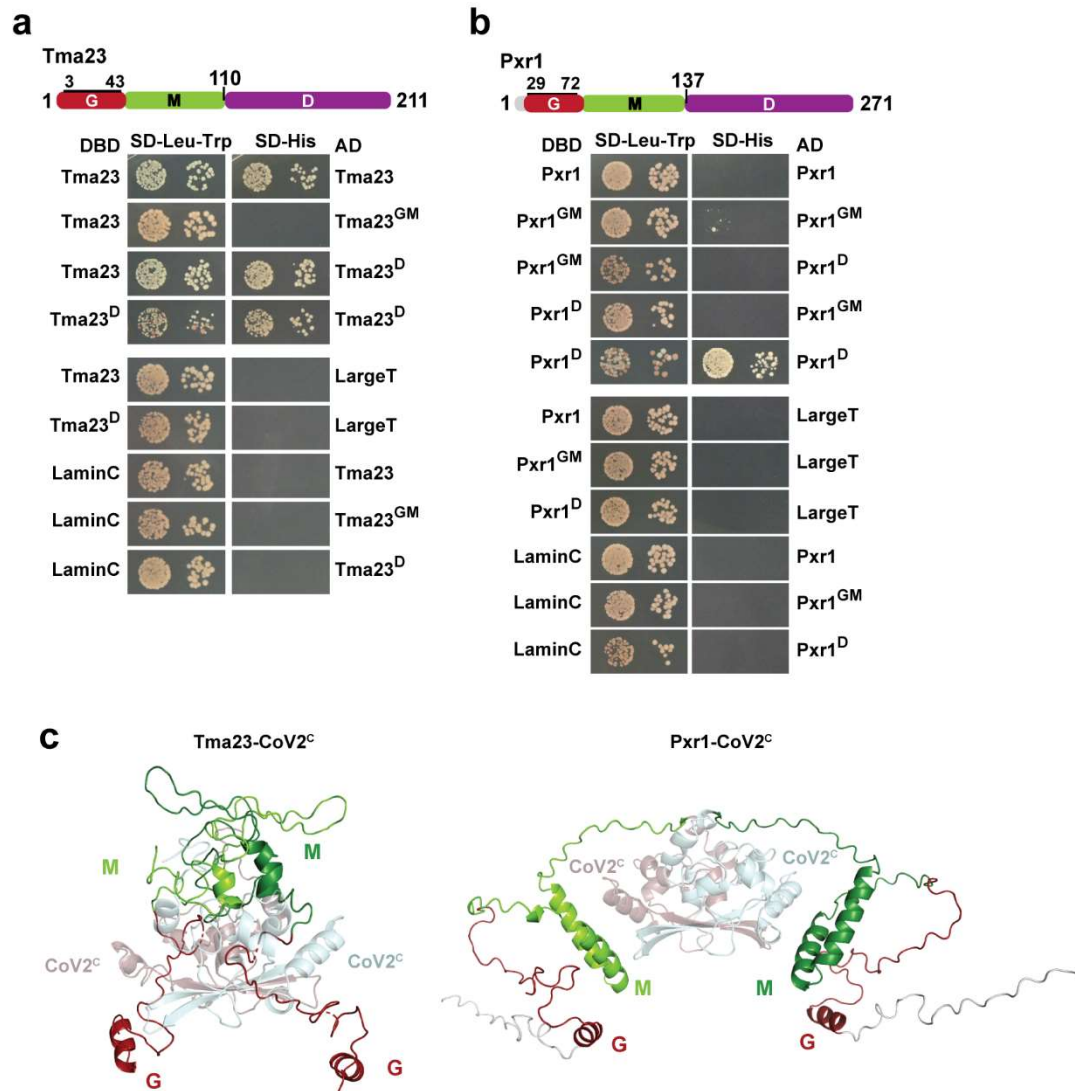

**Supplementary Figure 6. Tma23<sup>D</sup> and Pxr1<sup>D</sup> are dimerization segments. (a-b)** Plasmids encoding for wild type Tma23, Pxr1, Tma23<sup>GM</sup>, Pxr1<sup>GM</sup>, Tma23<sup>D</sup>, or Pxr1<sup>D</sup> fused to *LexA* DBD and *GAL4* AD were transformed in NMY32 strain. Transformants were spotted in 10-fold serial dilutions on the indicated selective medium and incubated at 30°C for 2 – 4 days. LaminC and LargeT were used as negative controls. **c**, AlphaFold2 structure prediction of Tma23 or Pxr1 CoV2 chimeric constructs, shown in cartoon representation.

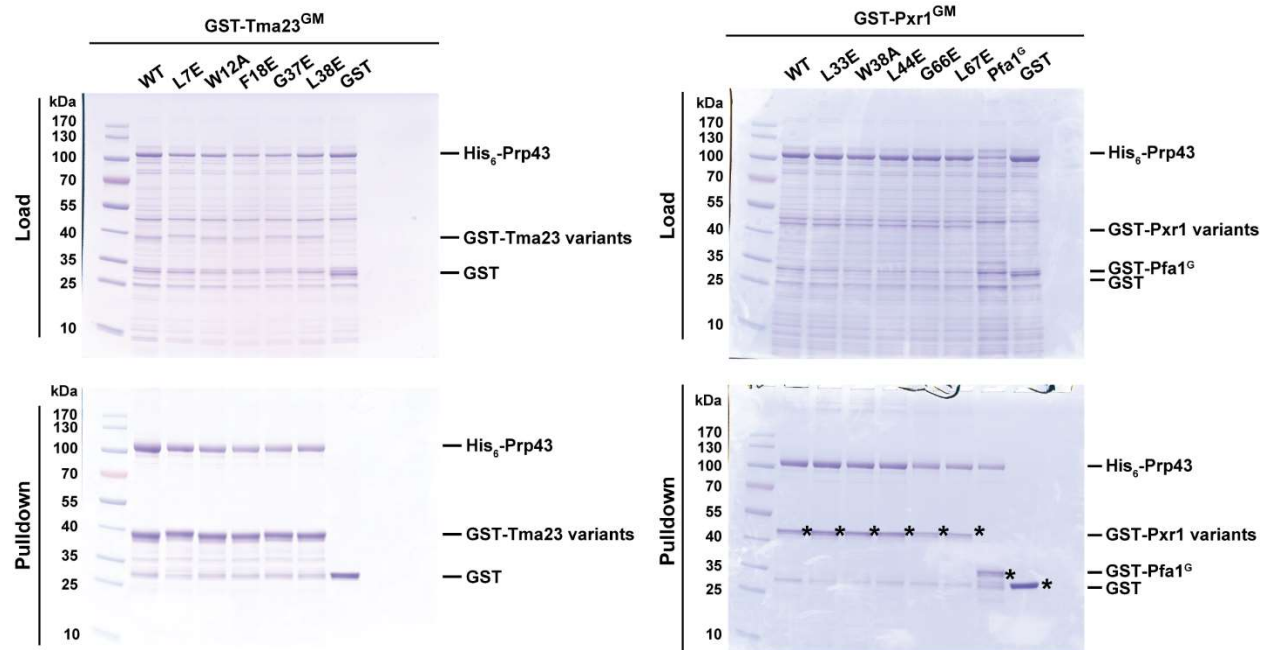

Uncropped SDS-PAGE gels: Supplementary Fig. 2b.

## Supplementary References

1. Altwater, M. et al. Targeted proteomics reveals compositional dynamics of 60S pre-ribosomes after nuclear export. *Mol Syst Biol* **8**, 628 (2012).
2. Altwater, M., Schütz, S., Chang, Y. & Panse, V.G. Dissecting ribosome assembly and transport in budding yeast. *Methods Cell Biol* **122**, 437-61 (2014).
3. Demmel, L. et al. The clathrin adaptor Gga2p is a phosphatidylinositol 4-phosphate effector at the Golgi exit. *Mol Biol Cell* **19**, 1991-2002 (2008).
4. Studer, M.K., Ivanović, L., Weber, M.E., Marti, S. & Jonas, S. Structural basis for DEAH-helicase activation by G-patch proteins. *Proc Natl Acad Sci U S A* **117**, 7159-7170 (2020).
5. Pettersen, E.F. et al. UCSF ChimeraX: Structure visualization for researchers, educators, and developers. *Protein Sci* **30**, 70-82 (2021).
6. Wan, R., Yan, C., Bai, R., Lei, J. & Shi, Y. Structure of an Intron Lariat Spliceosome from *Saccharomyces cerevisiae*. *Cell* **171**, 120-132.e12 (2017).
7. Walbott, H. et al. Prp43p contains a processive helicase structural architecture with a specific regulatory domain. *Embo j* **29**, 2194-204 (2010).
8. He, Y., Andersen, G.R. & Nielsen, K.H. Structural basis for the function of DEAH helicases. *EMBO Rep* **11**, 180-6 (2010).
9. Robert-Paganin, J. et al. Functional link between DEAH/RHA helicase Prp43 activation and ATP base binding. *Nucleic Acids Res* **45**, 1539-1552 (2017).
10. Tauchert, M.J., Fourmann, J.B., Christian, H., Lührmann, R. & Ficner, R. Structural and functional analysis of the RNA helicase Prp43 from the thermophilic eukaryote *Chaetomium thermophilum*. *Acta Crystallogr F Struct Biol Commun* **72**, 112-20 (2016).
11. Tauchert, M.J., Fourmann, J.B., Lührmann, R. & Ficner, R. Structural insights into the mechanism of the DEAH-box RNA helicase Prp43. *Elife* **6**(2017).
12. Hamann, F., Enders, M. & Ficner, R. Structural basis for RNA translocation by DEAH-box ATPases. *Nucleic Acids Res* **47**, 4349-4362 (2019).
13. He, Y., Staley, J.P., Andersen, G.R. & Nielsen, K.H. Structure of the DEAH/RHA ATPase Prp43p bound to RNA implicates a pair of hairpins and motif Va in translocation along RNA. *Rna* **23**, 1110-1124 (2017).
14. Zhang, J. et al. DHX15 is involved in SUGP1-mediated RNA missplicing by mutant SF3B1 in cancer. *Proc Natl Acad Sci U S A* **119**, e2216712119 (2022).
15. Murakami, K., Nakano, K., Shimizu, T. & Ohto, U. The crystal structure of human DEAH-box RNA helicase 15 reveals a domain organization of the mammalian DEAH/RHA family. *Acta Crystallogr F Struct Biol Commun* **73**, 347-355 (2017).
16. Felisberto-Rodrigues, C. et al. Structural and functional characterisation of human RNA helicase DHX8 provides insights into the mechanism of RNA-stimulated ADP release. *Biochem J* **476**, 2521-2543 (2019).
17. Schmitt, A., Hamann, F., Neumann, P. & Ficner, R. Crystal structure of the spliceosomal DEAH-box ATPase Prp2. *Acta Crystallogr D Struct Biol* **74**, 643-654 (2018).
18. Gotur, D. et al. Development of assays to support identification and characterization of modulators of DExH-box helicase DHX9. *SLAS Discov* (2023).
19. Bai, R. et al. Mechanism of spliceosome remodeling by the ATPase/helicase Prp2 and its coactivator Spp2. *Science* **371**(2021).
20. Hamann, F. et al. The structure of Prp2 bound to RNA and ADP-BeF(3)(-) reveals structural features important for RNA unwinding by DEAH-box ATPases. *Acta Crystallogr D Struct Biol* **77**, 496-509 (2021).
